# Supplementary material for: Increased Soluble Epoxide Hydrolase in Human Gestational Tissues from Pregnancies Complicated by Acute Chorioamnionitis
Source: Hindawi journal article supplement (doi:10.1155/2019/8687120), 2019-12-05

# Supplementary Figure 1

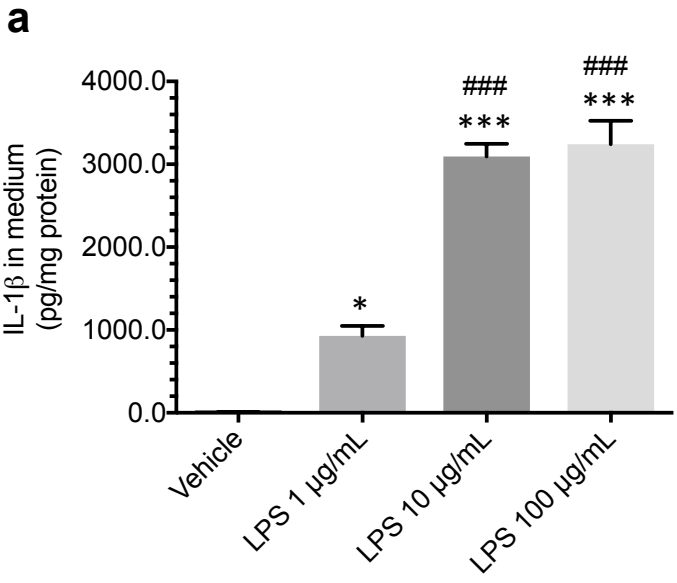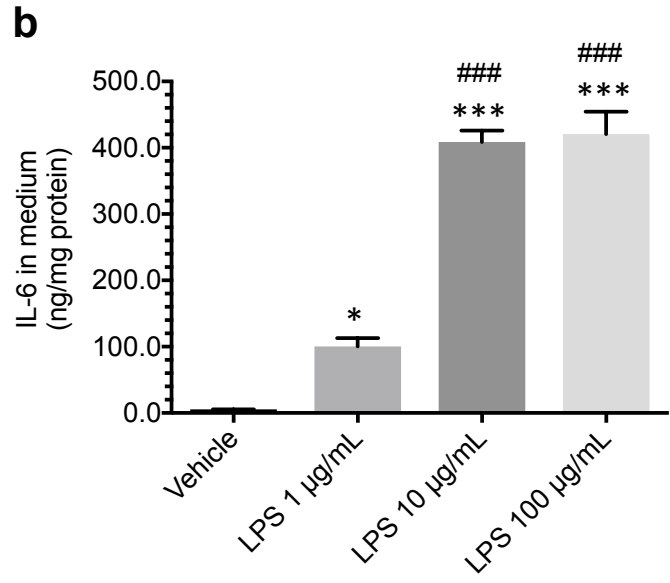

# Supplementary Figure 2

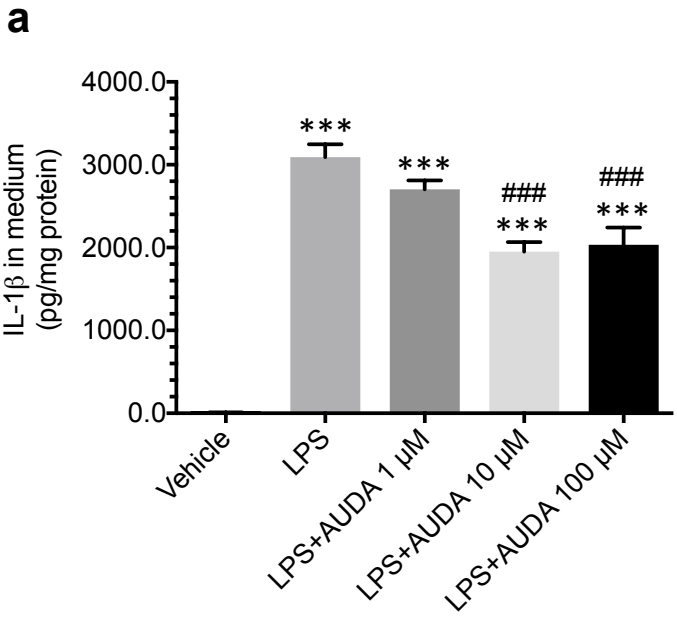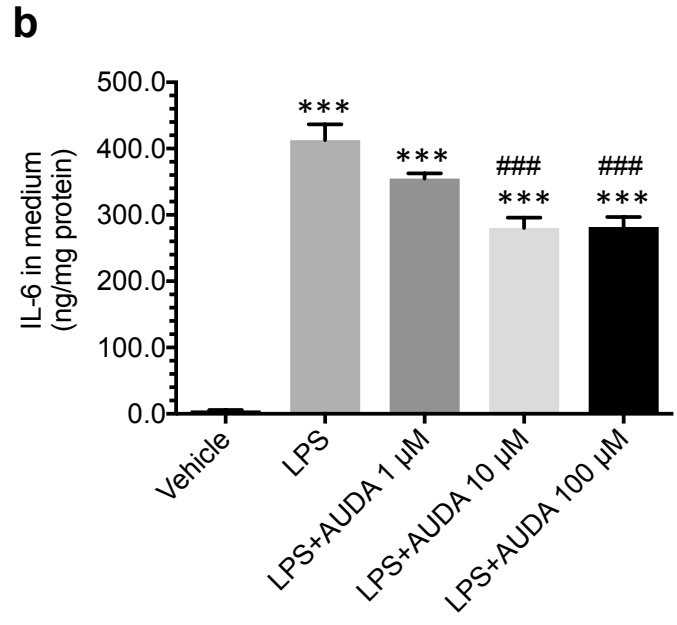

# Supplementary Figure 3

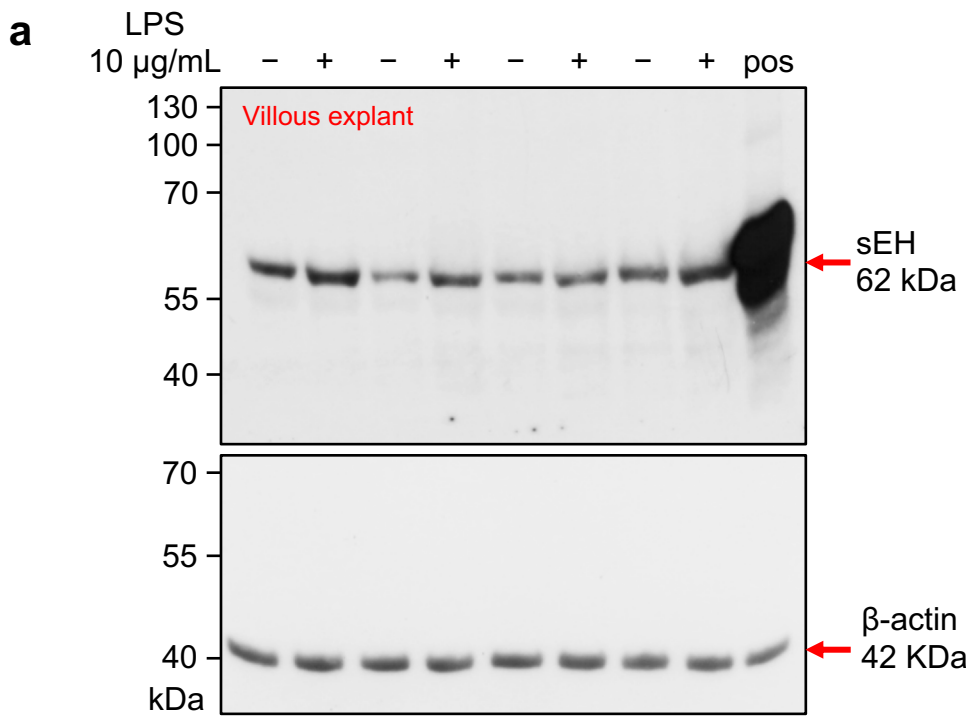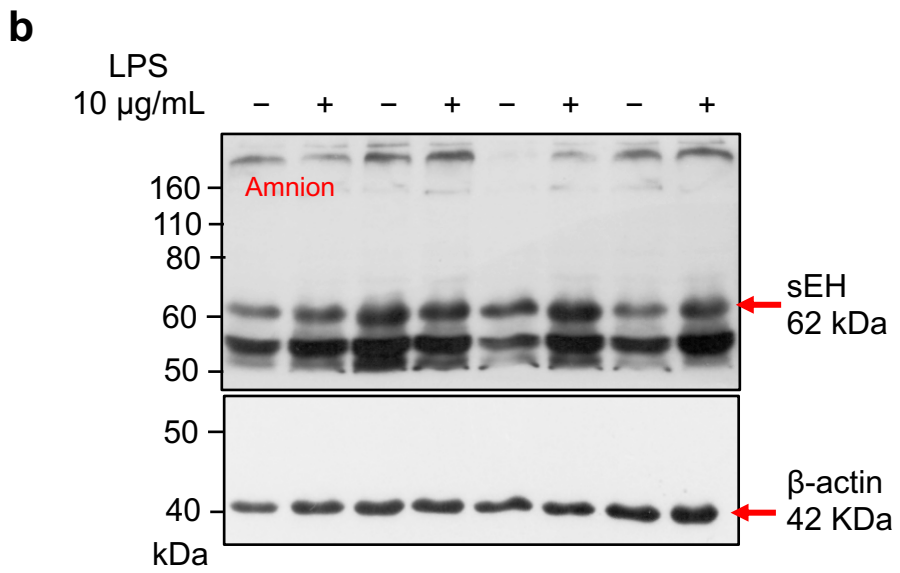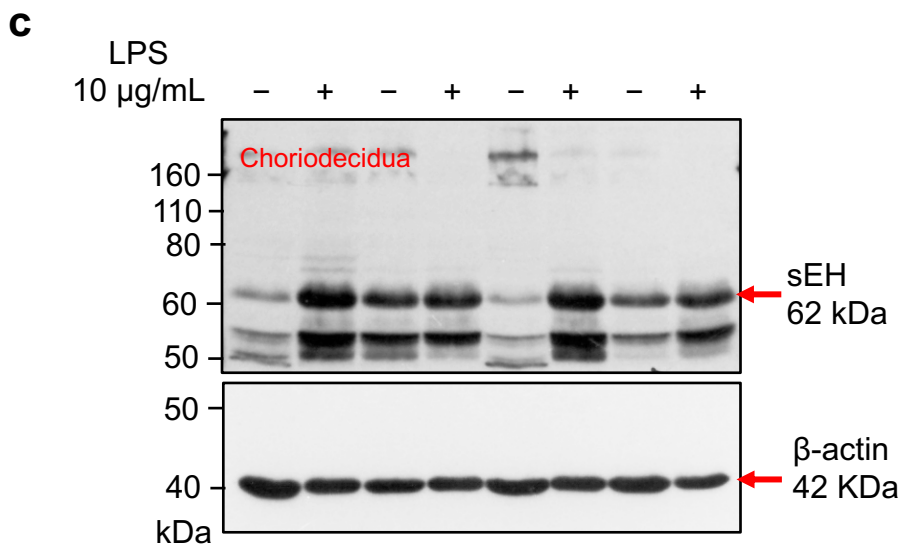

Supplement: f1 [file 8687120.f1.pdf]
